# Supplementary material for: Regulation of extra-embryonic endoderm stem cell differentiation by Nodal and Cripto signaling
Source: Oxford University Press journal article supplement (doi:10.1242/dev.065656), 2011-08-23
Supplement: dev065656tables1.pdf [file dev065656tables1.pdf]

**Table S1. Primers (5' to 3') used for PCR analyses**

| Gene           | Forward primer                 | Reverse primer                 |
|----------------|--------------------------------|--------------------------------|
| <i>ActR1l</i>  | GTCACACAGCCTACGTCGAA           | TTGAGTTGGAACGAGCACAG           |
| <i>ActR1lb</i> | ATGTGCCGTGGTGTCTGGT            | GACCTCCTGATCAGGGATAC           |
| <i>Afp*</i>    | GCCCAGACATACGAAGAAAACA         | TCTCTTTGTCTGGAAGCATTCT         |
| <i>Alk4</i>    | GTGGTGACGTGGCTGTGAAA           | TTTGGAGCAATGTCTATGGT           |
| <i>Alk5</i>    | GTCCGCAGCTCCTCATCGT            | GACAGTGCGGTTATGGCAGAT          |
| <i>Alk7</i>    | TGGGGGACGAAATCATCAAG           | GCGCACCTGCACCCCTCCAA           |
| <i>Cer1</i>    | TATGTGATGCCCCGACTGTA           | GGGCACAGTCTGCAGGTCT            |
| <i>Cer1*</i>   | AAGTGGAGAGATCACCTCTA           | GACACTCTTCGACTTGCATC           |
| <i>Cripto</i>  | ATGGACGCAACTGTGAACATGATGTTCCGA | CTTTGAGGTCCTGGTCCATCACGTGACCAT |
| <i>Cryptic</i> | CACCAACCCAGGGTATCAGTT          | AGAGTTCTGTCCAGTGTCTGC          |
| <i>Foxa2</i>   | CCCTACGCCAACATGAACTCG          | GTTCTGCCGGTAGAAAGGGA           |
| <i>Foxh1 F</i> | ATCCGTCAGGTCCAGGCAGTG          | CTTGCGCAAAGCTCTGTG             |
| <i>Gata6</i>   | ACCTTATGGCGTAGAAATGCTGAGGGTG   | CTGAATACTTGAGGTCAGTGTCTCGGG    |
| <i>Gata6*</i>  | CGGGCGCAGGCAGTGAGT             | CCAAGCCGCGTGATGAAGG            |
| <i>Gdf1 F</i>  | GTTGCGGCTGGAGGCTGAGAG          | CCCCTGGACCACTTCTACC            |
| <i>Gdf3 F</i>  | GTTCCAACCTGTGCCTCGCGTCTT       | AGCGAGGCAATGGAGAGAGCGGAGCAG    |
| <i>hHex</i>    | GTTCTCCAACGACCAGACCG           | GGAGGGTGAACACTGCGAAC           |
| <i>Hnf4a*</i>  | ACACGTCCCCATCTGAAGGTG          | CTTCCTTCTCATGCCAGCCC           |
| <i>Lefty1</i>  | AACCTTCGAGAGGTGGCAGG           | GCCTTCCAGCCGCACTCGTG           |
| <i>Nodal F</i> | AAGACCAAGCCACTGAGCAT           | GCCTTTGCACACAATTTCAA           |
| <i>Sox2 F</i>  | GGTTACCTCTTCTCCCACTCCAG        | TCACATGTGCGACAGGGGCAG          |

\*Primers for real-time PCR.
